# Supplementary material
Source: ML conference proceedings conference paper supplement (https://proceedings.neurips.cc/paper_files/paper/2018/hash/8d3369c4c086f236fabf61d614a32818-Abstract.html)
Supplement: Supplementary file [file 8d3369c4c086f236fabf61d614a32818-Supplemental.zip]

---

# Supplementary Material for Causal Discovery from Discrete Data using Hidden Compact Representation

---

Ruichu Cai<sup>1</sup>, Jie Qiao<sup>1</sup>, Kun Zhang<sup>2</sup>, Zhenjie Zhang<sup>3</sup>, Zhifeng Hao<sup>1,4</sup>

<sup>1</sup> School of Computer Science, Guangdong University of Technology, China

<sup>2</sup> Department of philosophy, Carnegie Mellon University

<sup>3</sup> Singapore R&D, Yitu Technology Ltd.

<sup>4</sup> School of Mathematics and Big Data, Foshan University, China  
 cairuichu@gdut.edu.cn, qiaojie.chn@gmail.com, kunz1@andrew.cmu.edu,  
 zhenjie.zhang@yitu-inc.com, zfhao@gdut.edu.cn

**Theorem 2.** Assume that in the causal direction there exists the transformation  $Y^I = f(X)$  such that  $P(Y|X) = P(Y|Y^I)$ , where  $|Y^I| < |X|$ , and assumption A1 holds. Then to produce the same distribution  $P(X, Y)$ , the reverse direction must involve more effective number of parameters in the model than the causal direction.

*Proof.* Recall that the parameter for the causal direction is  $d_{X \rightarrow Y} = |X| - 1 + |Y^I|(|Y| - 1)$ . Since  $|Y^I| < |X|$ , we conclude  $d_{X \rightarrow Y} < |X| - 1 + |X|(|Y| - 1)$ . For reverse direction, the number of effective parameters is  $d_{Y \rightarrow X} = |Y| - 1 + |X^I|(|X| - 1)$ . Based on Theorem 1, the reverse direction does not admit a low-cardinality hidden representation. Hence, we have  $|X^I| = |Y|$ . Compare the difference between  $d_{X \rightarrow Y}$  and  $d_{Y \rightarrow X}$ , we have:

$$\begin{aligned} d_{X \rightarrow Y} - d_{Y \rightarrow X} &< |X| - 1 + |X|(|Y| - 1) - (|Y| - 1 + |Y|(|X| - 1)) \\ &= 0 \end{aligned} \quad (1)$$

Thus, reverse direction must involve more effective number of parameters than the causal direction.  $\square$

**Theorem 3.** If the reverse direction involves more parameters than the causal direction to produce the same distribution  $P(X, Y)$ , the BIC of the causal direction is asymptotically higher than that of the reverse one.

*Proof.* First, we will proof that the likelihood on the causal direction asymptotically greater or equal than that of the reverse direction. Equation (2) gives the gap between the causal direction  $M$  and the reverse direction  $\hat{M}$ .

$$\begin{aligned} &\mathcal{L}(\mathcal{D}; M) - \mathcal{L}(\mathcal{D}; \hat{M}) \\ &= \sum_{i=1}^m \log \frac{P(X = x_i)P(Y = y_i|Y^I = f(x_i))}{P(Y = y_i)P(X = x_i|X^I = \hat{f}(y_i))} \\ &= \sum_{i=1}^m \log \frac{P(X = x_i, Y = y_i)}{P(Y = y_i)P(X = x_i|X^I = \hat{f}(y_i))} \\ &= mE_{x, y \sim p(x, y)} \left( \log \frac{P(X = x, Y = y)}{P(Y = y)P(X = x|X^I = \hat{f}(y))} \right) \\ &= mKL(P(X = x, Y = y) || P(Y = y)P(X = x|X^I = \hat{f}(y))) \\ &\geq 0 \end{aligned} \quad (2)$$

The first equality is based on the likelihood of the HCR model. The second equality is based on the fact that  $X \perp\!\!\!\perp Y|Y'$ . The third equality is based on the existing of sufficient number of samples. The forth equality and the fifth inequality are based on the definition and the property of KL-divergence respectively.

Second, we will show that the penalty on the causal direction less than the reverse direction. Because the causal direction  $M$  and the reverse direction  $\hat{M}$  produce the same probability  $P(X, Y)$ , and the inverse direction  $\hat{M}$  involves more parameters than the causal direction  $M$  according to the Theorem 2.

Thus, the causal direction's BIC is asymptotically higher than the reverse ones. □
